# Supplementary material for: Giant Raman enhancement on nanoporous gold film by conjugating with nanoparticles for single-molecule detection
Source: Royal Society of Chemistry journal article supplement (doi:10.1039/c0jm00884b), 2010-01-01
Supplement: c0jm00884b.pdf [file c0jm00884b.pdf]

*Supplementary Information*

**Giant Raman enhancement on nanoporous gold film by conjugating  
with nanoparticles for single-molecule detection**

Lihua Qian<sup>1</sup>, Biswajit Das<sup>1</sup>, Yan Li<sup>2</sup>, and Zhili Yang<sup>2</sup>

<sup>1</sup>*Nevada Nanotechnology Center, Howard R. Hughes College of Engineering,  
University of Nevada, Las Vegas, Nevada 89154-4026, USA*

<sup>2</sup>*Department of Physics, Xiamen University, Xiamen 361005, China*

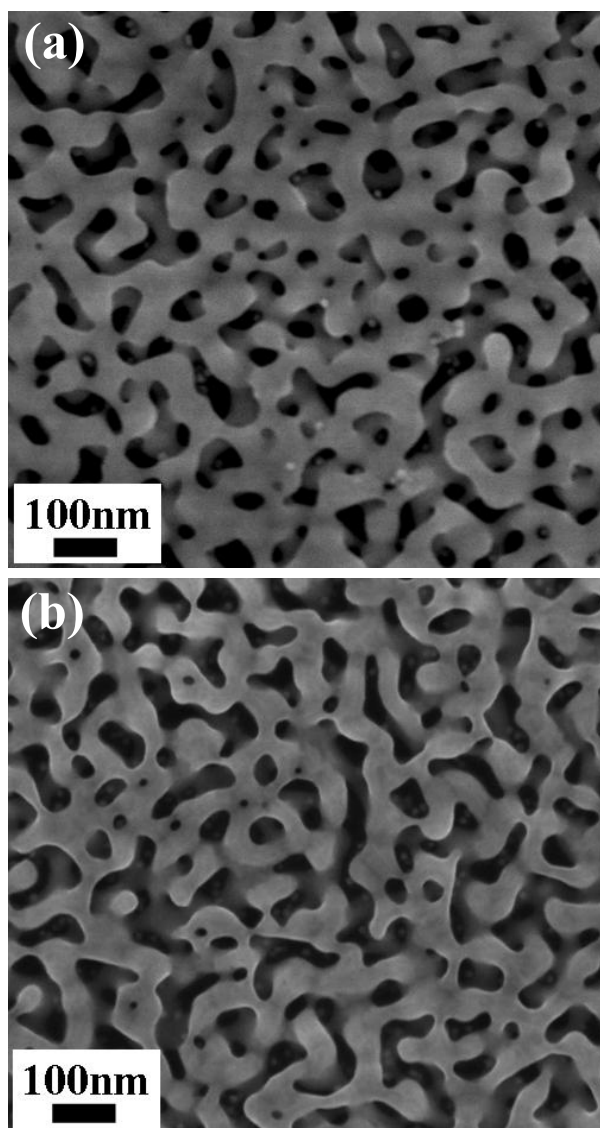

Figure S1. SEM images of NPG films conjugated with gold nanoparticles with different densities.

Fig. S1(a-b)/Qian et al.

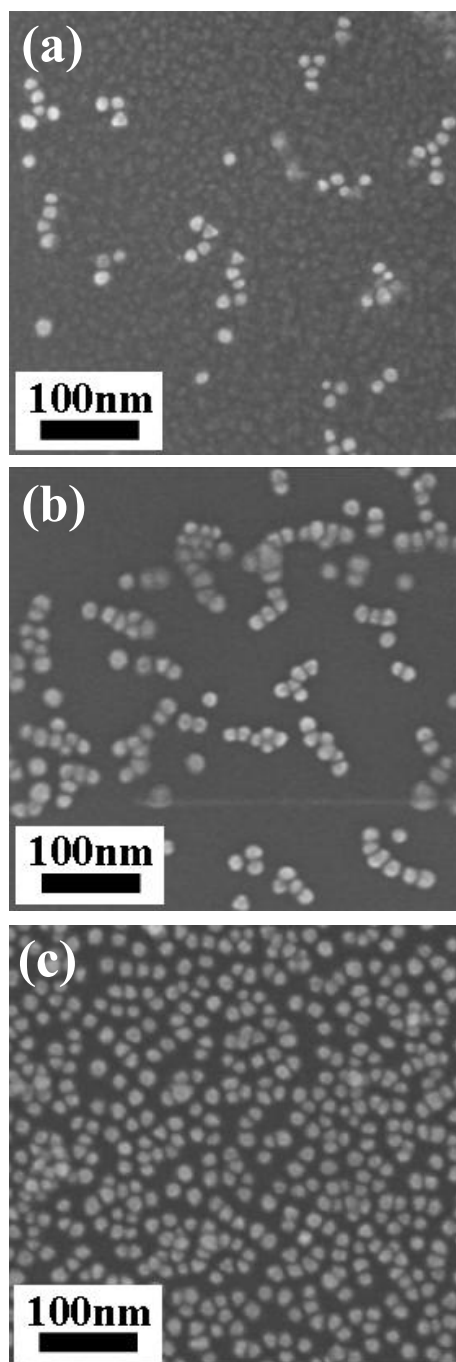

Figure S2. Typical SEM images of single layer gold nanoparticles with different densities.

Fig. S2(a-c)/Qian et al.

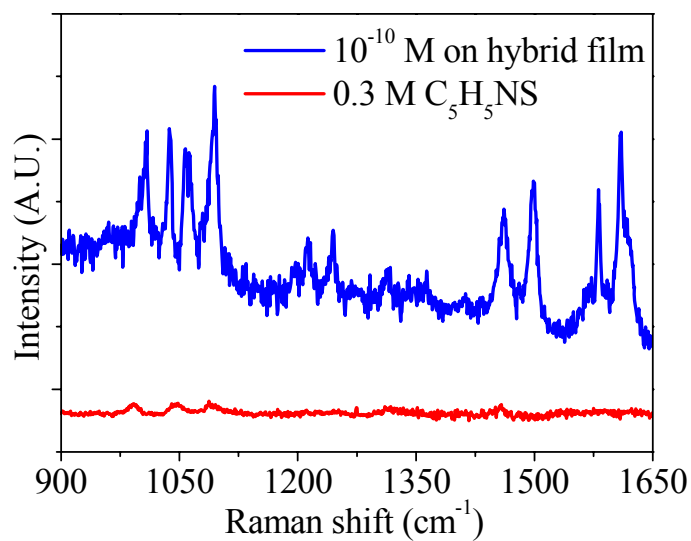

Figure S3. Raman spectra collected from NPG-nanoparticle conjugates after immersing into 10<sup>-10</sup> M 4-MP solution and from bulk solution with a concentration of 0.3 M.

Fig. S3/Qian et al.

Table S1: Assignments of Raman bands at different frequencies  $\nu$  observed in this work.

| $\nu$ (cm <sup>-1</sup> ) | Assignment                                                | $\nu$ (cm <sup>-1</sup> ) | Assignment                                              |
|---------------------------|-----------------------------------------------------------|---------------------------|---------------------------------------------------------|
| 925                       | 5b <sub>1</sub> out-of-plane C-H def                      | 1247                      | in-plane N-H def                                        |
| 950                       | out-of-plane def for N-H <sup>+</sup>                     | 1316                      | 3b <sub>2</sub> in-plane C-H def                        |
| 1017                      | 1a <sub>1</sub> ring breathing                            | 1372                      | 14b <sub>2</sub> ring stretch                           |
| 1053                      | 18a <sub>1</sub> in-plane C-H def                         | 1448                      | 19b <sub>2</sub> ring stretch                           |
| 1088                      | 18b <sub>2</sub> in-plane C-H def                         | 1472                      | 19a <sub>1</sub> ring stretch                           |
| 1097                      | 12a <sub>1</sub> trigonal ring breathing with C=S         | 1586                      | 8b <sub>2</sub> ring stretch with deprotonated nitrogen |
| 1141                      | 15 b <sub>2</sub> C-H def                                 | 1610                      | 8b <sub>2</sub> ring stretch with protonated nitrogen   |
| 1196                      | 9a <sub>1</sub> in-plane C-H def with protonated nitrogen | 1621                      | 8a <sub>2</sub> ring stretch                            |
| 1213                      | 9a <sub>1</sub> in-plane C-H def                          |                           |                                                         |

Table S1/Qian et al.
